# Supplementary material for: The Lhx9-Integrin pathway is essential for positioning of the proepicardial organ
Source: Oxford University Press journal article supplement (doi:10.1242/dev.129551), 2016-01-01
Supplement: dev129551supp.pdf [file dev129551supp.pdf]

## Supplementary Materials and Methods

*X. laevis* is an allotetraploid species, which resulted from whole genome duplication events after interspecific hybridization of an ancestral diploid species (Uno et al., 2013). Many genomic loci have been duplicated, including *lhx9*. This resulted in a short (*lhx9.S*, Version 8.0 chr4S:74365055-74397926) and long form of *lhx9* (*lhx9.L*, Version 8.0 chr4L:102410656-102438303). Whilst the coding region sequence of *lhx9.S* and *lhx9.L* is highly conserved (DNA 95%, protein 96%), the genomic scaffolds are only 86% identical (NCBI Blast, ClustalW, Xenbase *X. laevis* genome browser v8.0).

To enable sufficient and reproducible gene function depletion, we designed and utilized two strategies. One was to microinject a translation-blocking Morpholino (MOT) for both *lhx9* loci (Fig. S1, Fig. S7, Supplemental Table 2) together with a 5 base mismatch control. The other strategy was to design two splice blocking MO that target exon 1/intron 1 from each loci (MO1) (Fig. S1, Supplemental Table 2). Both strategies resulted in significant reduction in Lhx9 translation and *lhx9* transcription (Fig. S7, Fig. S8), therefore confirming reproducible depletion of Lhx9 function using two independent methods. Note that both strategies deplete Lhx9 $\alpha$  and Lhx9HD isoforms. Injection of the 5-base mismatch control MO lead to no obvious embryological defects whilst the phenotype observed by depleting Lhx9 by either MO strategy was highly comparable, supporting the specificity of each method. Interestingly, microinjecting each MO1 individually did not result in any epicardial defect (therefore serving as a control), further supporting the specificity of MO1 as well as suggesting both *lhx9.S* and *lhx9.L* genomic loci are developmentally regulated and actively required.

## Supplemental Figures

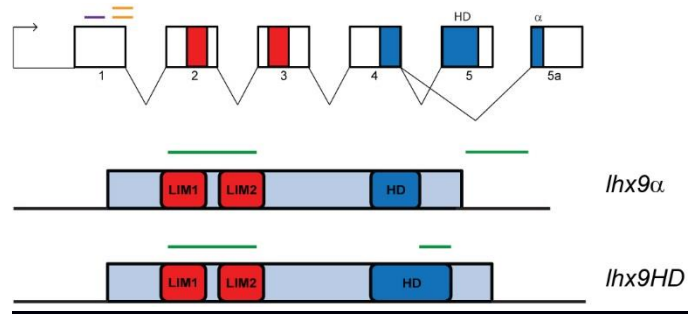

*Figure S1. Lhx9 genomic loci and isoform organization*

Schematics of *X. laevis* *Lhx9* genomic locus (top) and mRNA (bottom), showing localization of LIM protein binding domains (red) in exon 2 and 3, and the DNA-binding homeodomain in exons 4 and 5 (blue). Not to scale. Note that *lhx9α* isoform harbors a truncated HD due to alternative splicing to exon 5a. Translation-blocking (purple) and splice-blocking (orange) Morpholinos are depicted on exon 1 of genomic locus. Green bars on mRNA schematics depict localization of in situ hybridization probes.

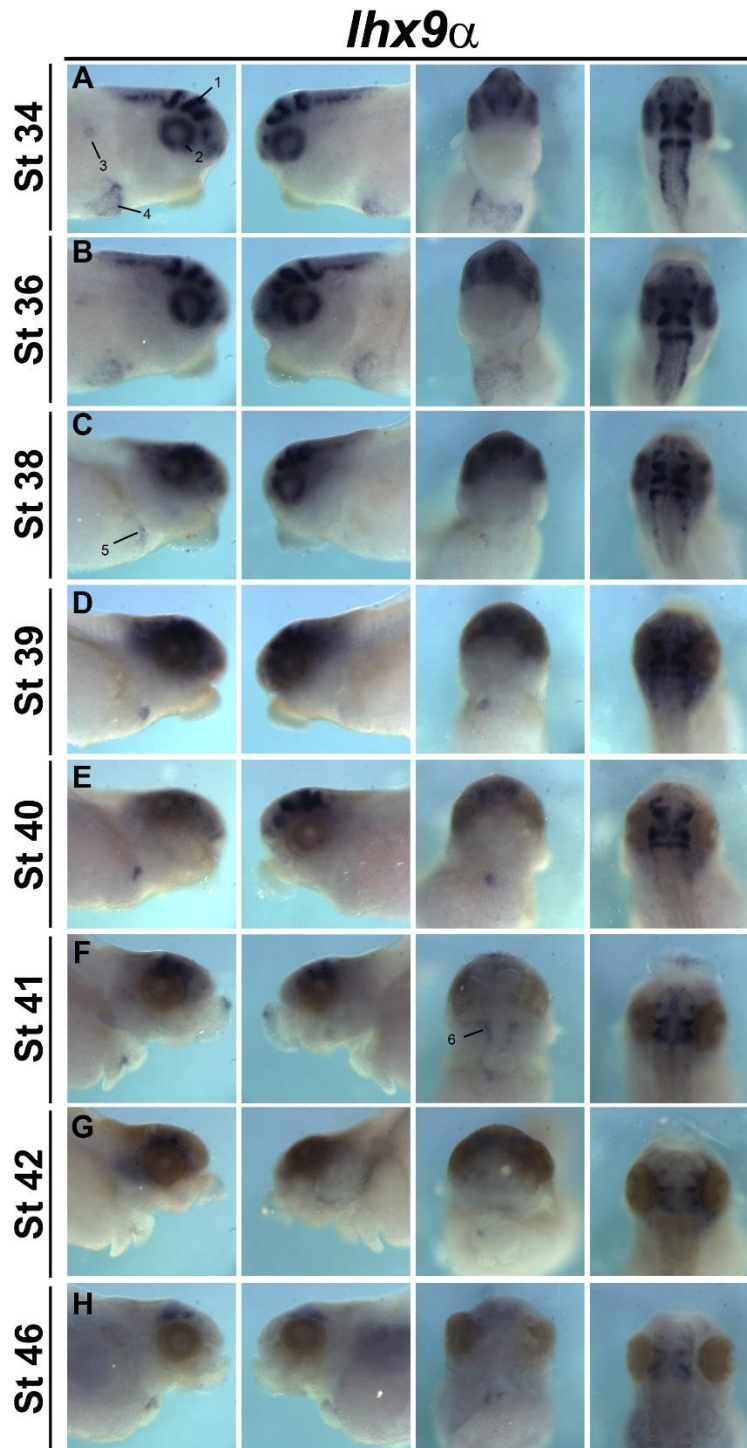

Figure S2. Spatio-temporal analysis of *lhx9 $\alpha$*  during *Xenopus* embryogenesis.

In situ hybridization right, left, ventral and dorsal views of wild-type embryos showing *lhx9 $\alpha$*  expression of the anterior region, from stage 34 to stage 46. 1; neural tube, 2; retina, 3; kidney, 4; septum transversum, 5; proepicardial cluster, 6; jaw cartilage.

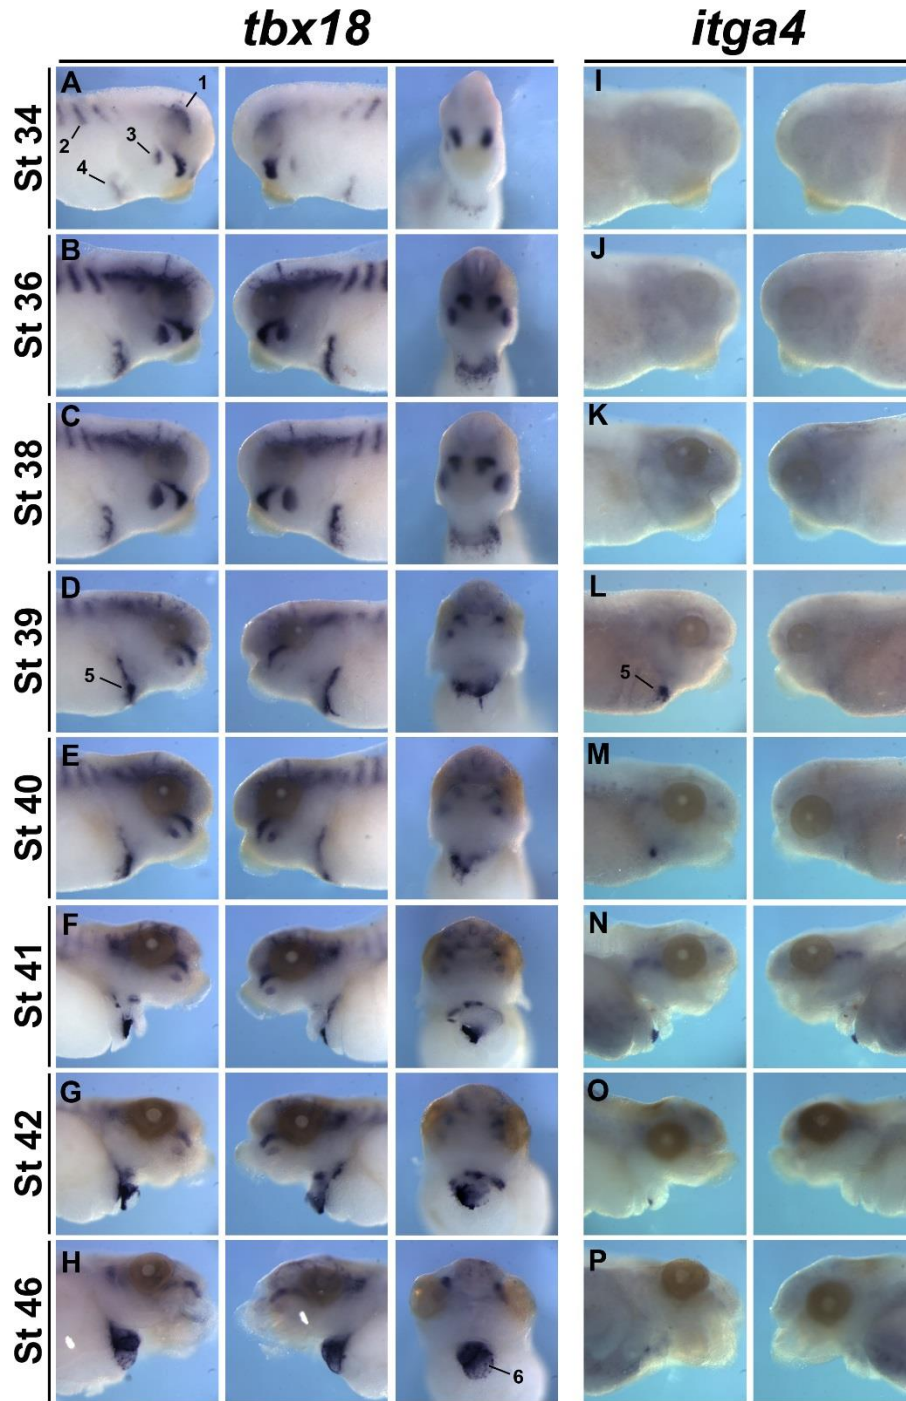

Figure S3. Spatio-temporal analysis of *tbx18* and *itga4* during *Xenopus* embryogenesis.

(A-H) In situ hybridization of *tbx18* showing right, left and ventral views of wild-type embryos from stage 34 to 46, anterior region of embryo. (I-P) In situ hybridization of *itga4* showing right and left views of anterior region from stage 34-46. 1; cranial mesoderm, 2; somites, 3; branchial arches, 4; septum transversum, 5; proepicardial cluster, 6; epicardium.



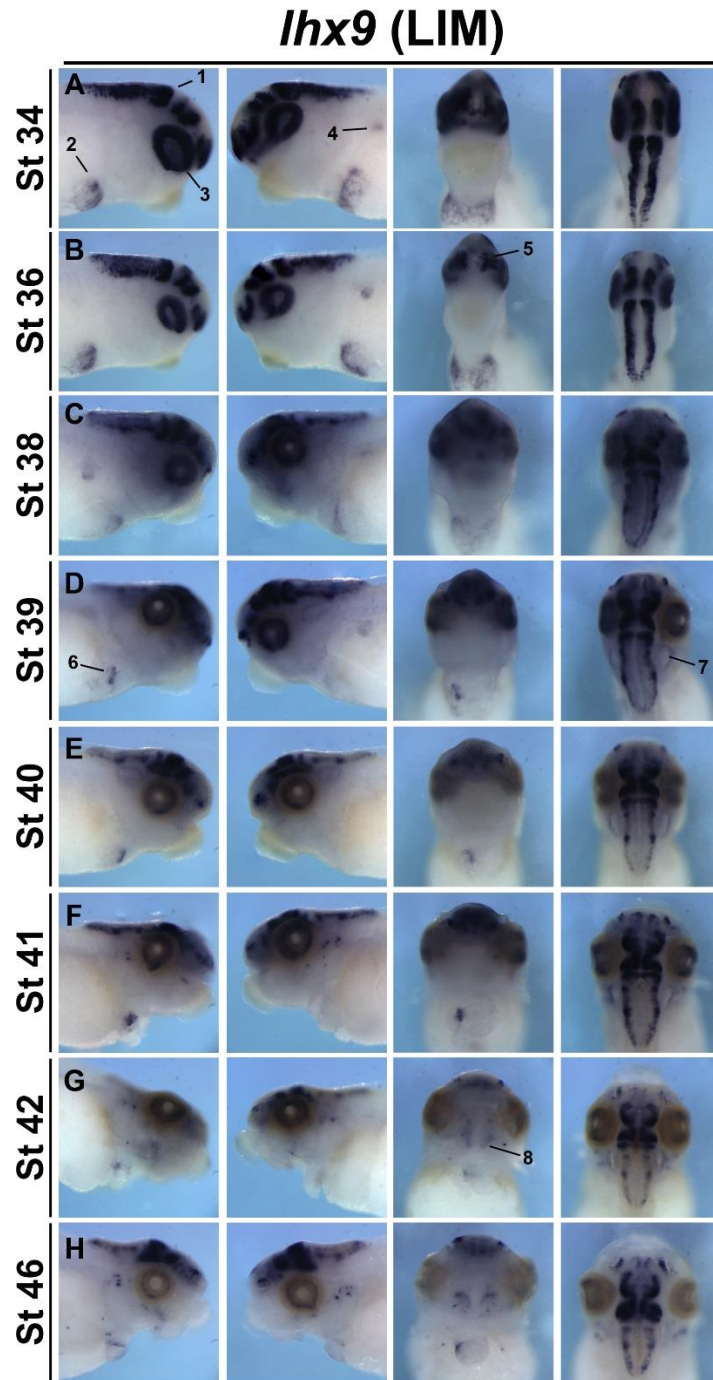

Figure S4. Spatio-temporal analysis of *lhx9* during *Xenopus* embryogenesis.

In situ hybridization of whole embryo anterior region using probe specific for the LIM domains of *lhx9*. Right, left, ventral and dorsal views of wild-type embryos from stage 34 to stage 46. 1; neural tube, 2; septum transversum, 3; retina, 4; kidney, 5; nasal placode, 6; proepicardial cluster, 7; otic placode, 8; jaw cartilage.

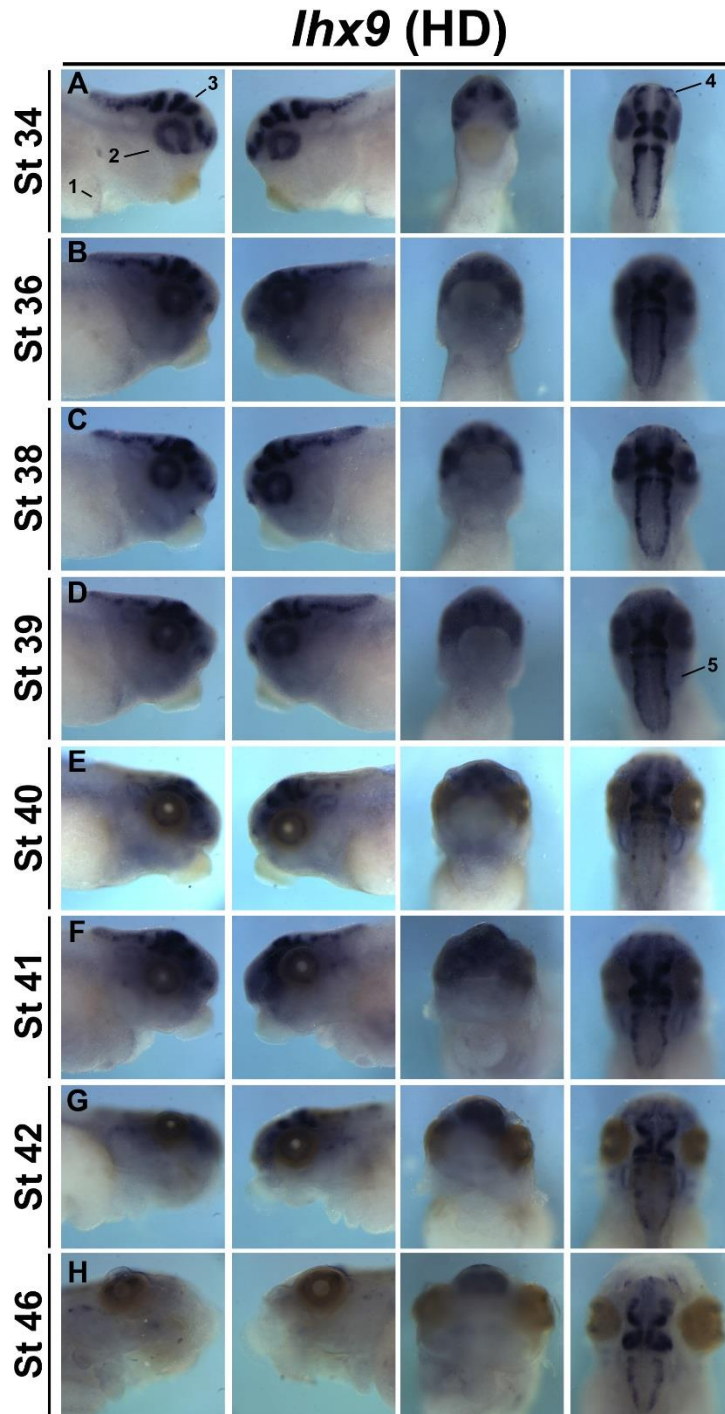

Figure S5. Spatio-temporal analysis of *lhx9*HD during *Xenopus* embryogenesis.

In situ hybridization right, left, ventral and dorsal views of wild-type embryos showing *lhx9*HD expression of the anterior region over time, from stage 34 to stage 46. 1; septum transversum, 2; retina, 3; neural tube, 4; nasal placode, 5; otic placode.

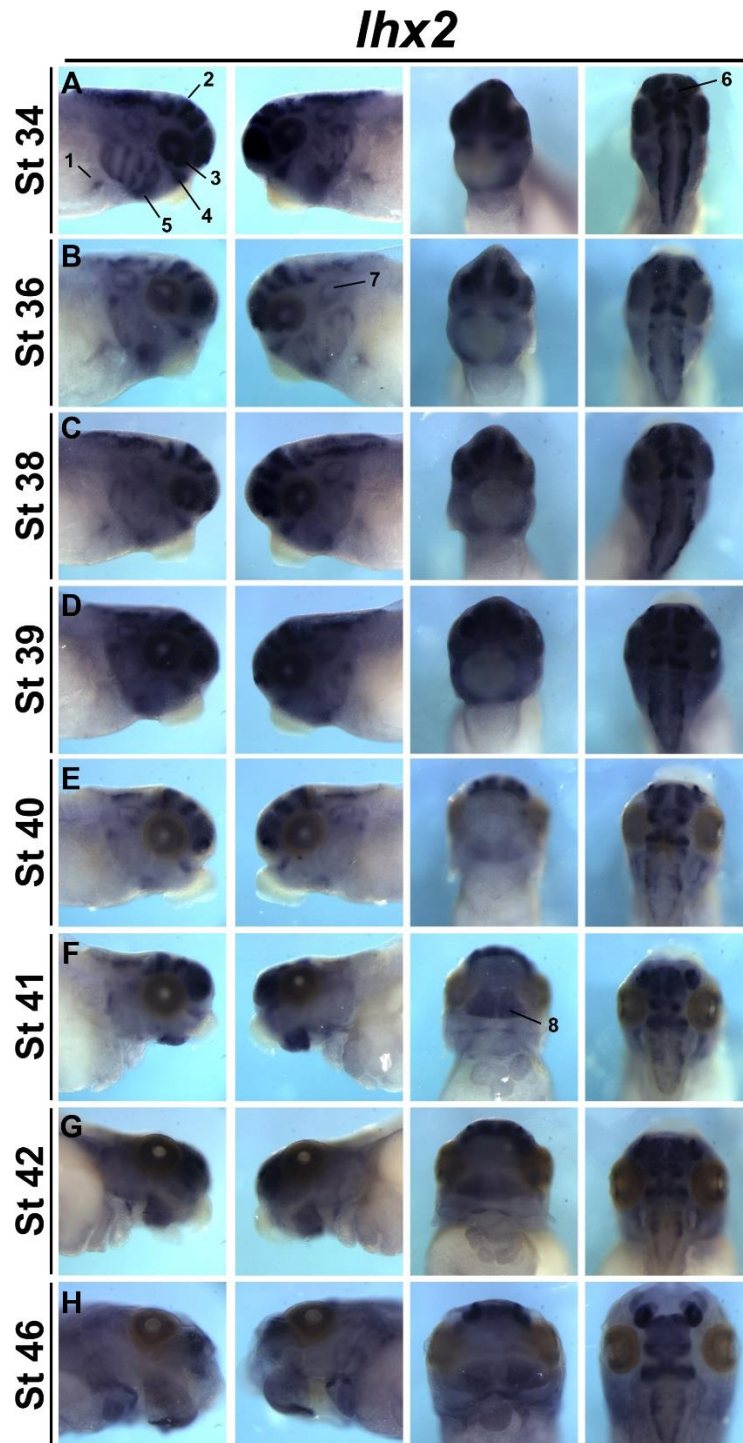

Figure S6. Spatio-temporal analysis of *lhx2* during *Xenopus* embryogenesis.

In situ hybridization right, left, ventral and dorsal views of wild-type embryos showing *lhx2* expression of the anterior region over time, from stage 34 to stage 46. 1; lung bud, 2; neural tube, 3; retina, 4; mandibular arch, 5; branchial arches, 6; pineal gland, 7; otic placode, 8; lower jaw.

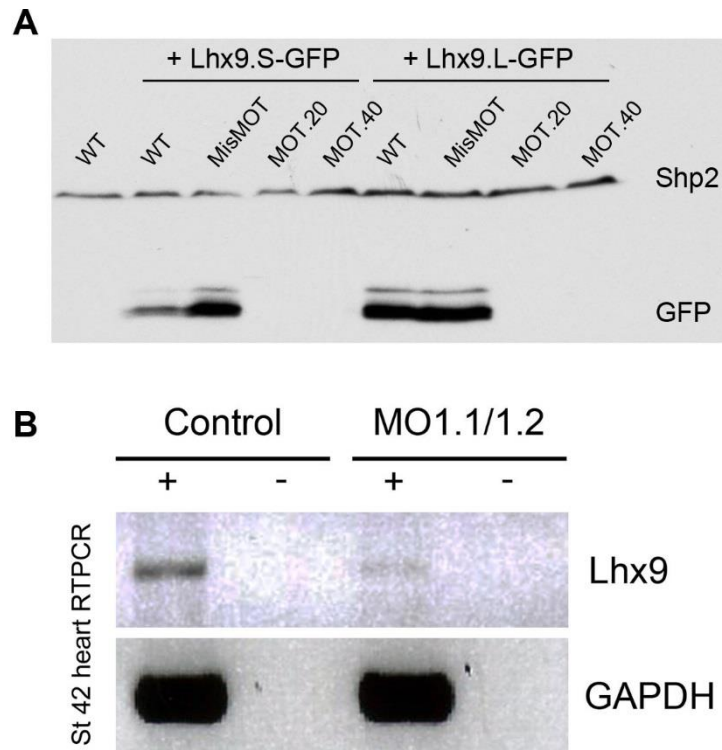

Figure S7. Validation of Lhx9 depletion assays.

(A) Validation of MO-specific inhibition of Lhx9 translation by GFP western blot on stage 11 embryos, injected with 1ng Lhx9-5'UTR-GFP RNA and MO at various concentrations (20-40 ng). Shp2 is used as a protein loading control. MOT targets the translational start site from both the short and long genomic versions of *X. laevis* Lhx9. (B) RT-PCR analysis of cardiac cDNA from stage 42 embryos injected with both MO1 (30ng each) targeting the short and long genomic versions of *X. laevis* Lhx9. Negative control lanes (-) are without superscript II enzyme, GAPDH PCR as loading control.



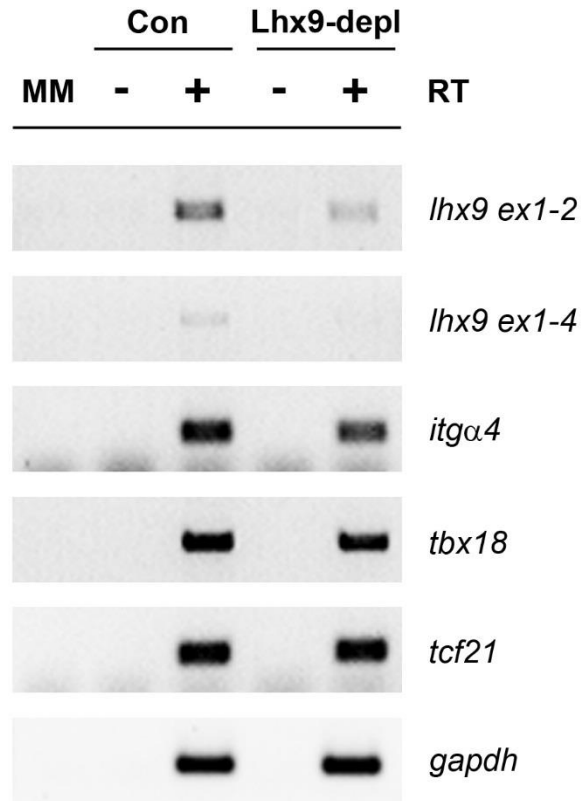

Figure S8. RT-PCR validation of epicardial marker expression in *Lhx9*-depleted hearts.

RT-PCR was performed on equivalent amounts of RNA from control or *Lhx9*-MO1-depleted hearts from stage 41-42. *Lhx9* is significantly depleted by two PCR amplification methods, as well as decreased *itgα4*. *Tbx18* and *tcf21* appeared indistinguishable. *Gapdh* used as loading control.

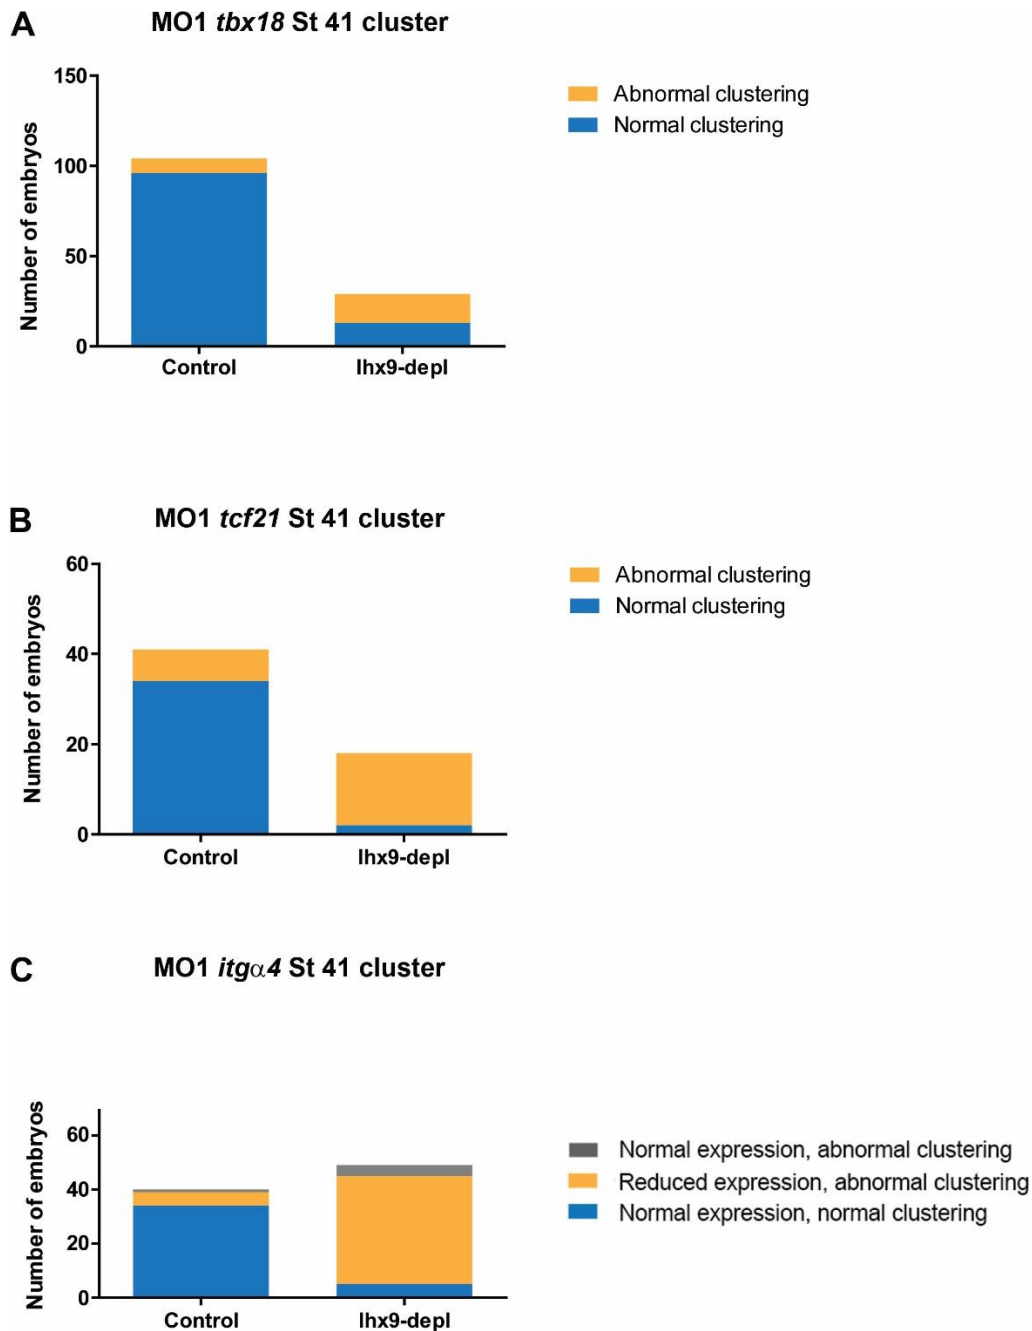

Figure S9. *Lhx9* splice-blocking MO depletion strategy gives comparable PE clustering defects to translation-blocking MO.

Clustering defects at stage 41 as assessed by (A) *tbx18* and (B) *tcf21* whole embryo in situ hybridization expression were present in *Lhx9*-MO1-depleted embryos (Fishers exact test  $p = <0.0001$ ). (C) Defects observed in *itga4* expression and localization was significant by Chi-square test ( $p = <0.0001$ ) in *Lhx9*-MO1-depleted embryos. From three independent experiments.

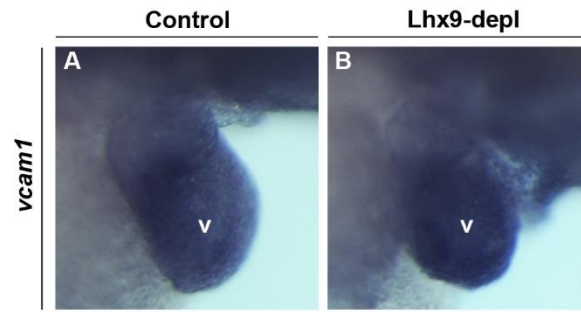

*Figure S10. Lhx9 depletion has no obvious effects on vcam1 expression*

Lhx9-depletion at stage 41(B) did not significantly alter the expression of *vcam1* in the heart compared to controls (A) by in situ hybridization, 6 embryos per condition. v; ventricle.

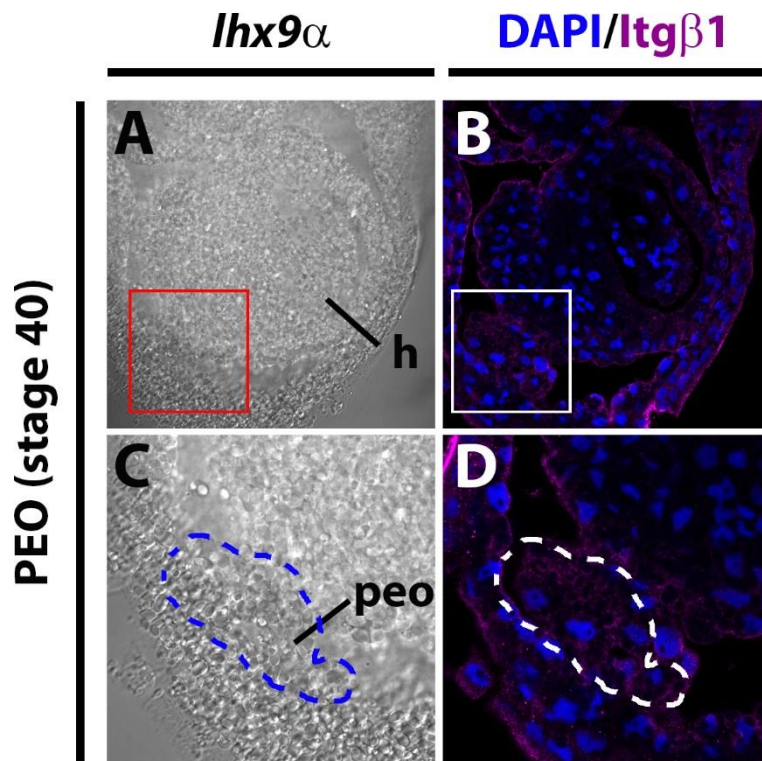

*Figure S11. Lhx9α expression correlates with epicardial marker Integrin β1*

Transverse agarose sections demonstrate the co-localization of *lhx9α* in situ hybridization (A, C) with the epicardial cell marker *Itgβ1* (B, D, magenta) and DAPI (blue) at stage 40. Magnified images (C, D) shown in boxes (A, B). h, heart; peo, proepicardial organ.



Table 1. List of primers used for RT-PCR or plasmid construct

| <b><u>Primer</u></b>  | <b><u>Assay</u></b>                                                                                                         | <b><u>Primer sequence 5'-<br/>3'</u></b> |
|-----------------------|-----------------------------------------------------------------------------------------------------------------------------|------------------------------------------|
| gapdh_RTPCR_F         | RTPCR, 159 bp                                                                                                               | ttgaaggagggtgccaag                       |
| gapdh_RTPCR_R         |                                                                                                                             | gatgaccttgcgagaggag                      |
| lhx9_RTPCR_ex1F       | RTPCR, 275 bp                                                                                                               | atatggaaattgtgggtgc                      |
| lhx9_RTPCR_ex2R       |                                                                                                                             | ctgtccacagccaagaggt                      |
| lhx9_RTPCR_ex1F       | RTPCR, 836 bp                                                                                                               | gtgcagagcagacgaaagtg                     |
| lhx9_RTPCR_ex4R       |                                                                                                                             | tcattgtacggagctggtga                     |
| lhx9_alpha3'UTR_ISH.F | ISH, 3'UTR of alpha isoform (short 98 %, long 98 %)                                                                         | ctacaaccacgcttcaaaa                      |
| lhx9_alpha3'UTR_ISH.R |                                                                                                                             | gcagctggagtaattgcaca                     |
| lhx9_LIM_ISH.F        | ISH, LIM domain 474 bp (short 100 %, long ~ 96%, Lhx2 78 %)                                                                 | gcagacgaaagtgcctatcc                     |
| lhx9_LIM_ISH.R        |                                                                                                                             | tccggcagtagacaaggtt                      |
| lhx9_HD_ISH.F         | ISH, homeodomain 254 bp (short 99 %, long 95 %)                                                                             | ggtttcaaacgcacgag                        |
| lhx9_HD_ISH.R         |                                                                                                                             | ttaaaaaaggttggttagtg                     |
| lhx2_ISH.F            | ISH, 5'UTR 667 bp (short 80 %, long 100 %)                                                                                  | accctctccccattactc                       |
| lhx2_ISH.R            |                                                                                                                             | cctaagccatgcaccgaata                     |
| lhx9_5'UTRex1_long.F  | MOT western blot assay, cloned 5'UTR and 1 <sup>st</sup> exon (326 bp) from long allele, fused to GFP (pEGFP-N1, Clontech)  | ctcaccgagcaagttccgcg                     |
| lhx9_5'UTRex1_long.R  |                                                                                                                             | gagtttctctgccattgacct                    |
| lhx9_5'UTRex1_short.F | MOT western blot assay, cloned 5'UTR and 1 <sup>st</sup> exon (297 bp) from short allele, fused to GFP (pEGFP-N1, Clontech) | cattctcagccgggcaagtt                     |
| lhx9_5'UTRex1_short.R |                                                                                                                             | gagtttctctgctattgacct                    |

Table 2. Morpholino sequences.

| <b><u>Target</u></b>                                             | <b><u>Sequence (complimentary)</u></b> |
|------------------------------------------------------------------|----------------------------------------|
| Lhx9 translation-blocking (5'UTR and start site, short and long) | TCTGCACCCCACAATTTCCATATAC              |
| Lhx9 translation-blocking 5 base mismatch control                | TATGAACACCAAATTTCAATATAC               |
| Lhx9.S splice-blocking (donor exon 1)                            | TGCCCAGACGCCAGACTTACAGTTT              |
| Lhx9.L splice-blocking (donor exon 1)                            | CGCGGCTACTTACAGTTTCTCTGCC              |
